# Supplementary material for: CasTuner is a degron and CRISPR/Cas-based toolkit for analog tuning of endogenous gene expression
Source: PubMed Central journal article supplement (PMC10239436; doi:10.1038/s41467-023-38909-4), 2023-06-03

Description: Strategy for double sorting of degron-Cas-Repressor systems

Cells are first sorted gating on BFP levels with a wider gate (BFP+), expanded and then sorted again (M population).

\*Page 2: Example of first sorting. Sample: degron-dCas9-KRAB. Population sorted: BFP+

\*Page 3: Example of second sorting. Sample: degron-dCas9-KRAB. Population sorted: M and Hi. Population M is used for all the experiments described in the manuscript.

The same gating coordinates are applied to all samples.

BD FACSDiva 8.0.1

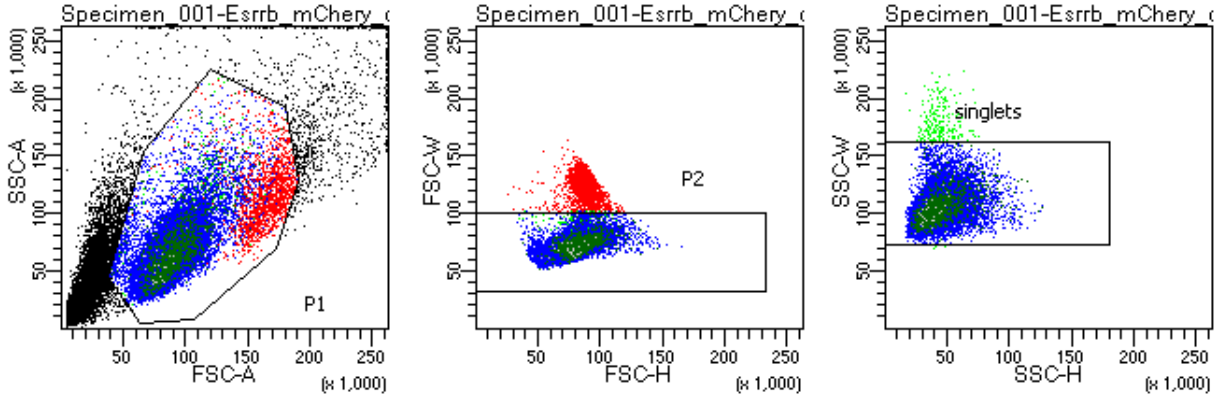

Tube: Esrrb\_mChery\_dCas9\_dTAG\_KRAB\_BFP

| Population | #Events | %Parent | %Total |
|------------|---------|---------|--------|
| All Events | 37,981  | ####    | 100.0  |
| P1         | 30,000  | 79.0    | 79.0   |
| P2         | 28,317  | 94.4    | 74.6   |
| singlets   | 28,078  | 99.2    | 73.9   |
| BFP+       | 1,369   | 4.9     | 3.6    |
| negative   | 27      | 0.1     | 0.1    |

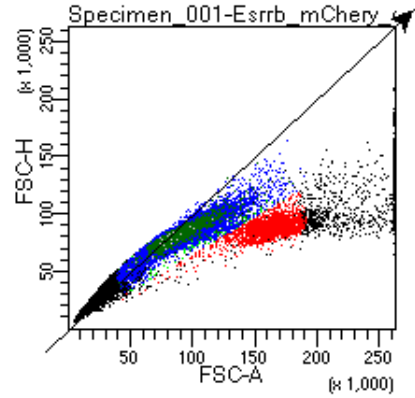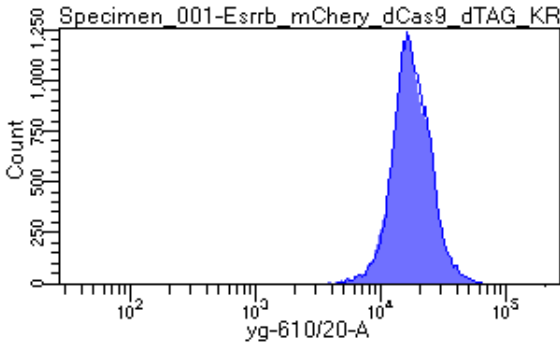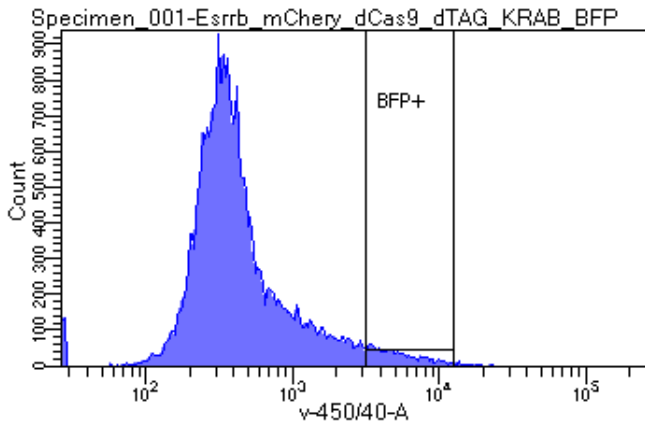

# BD FACSDiva 8.0.1

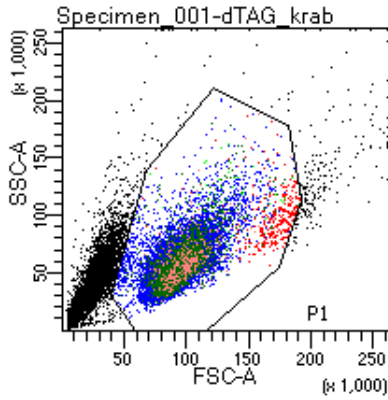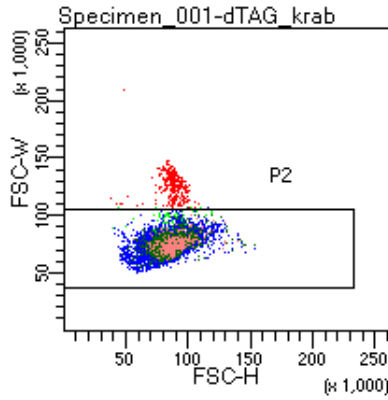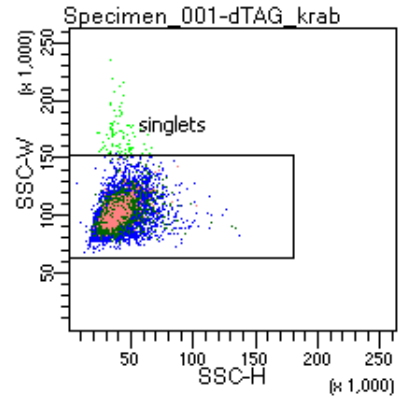

Tube: dTAG\_krab

| Population | #Events | %Parent | %Total |
|------------|---------|---------|--------|
| All Events | 24,131  | ####    | 100.0  |
| P1         | 20,000  | 82.9    | 82.9   |
| P2         | 19,683  | 98.4    | 81.6   |
| singlets   | 19,594  | 99.5    | 81.2   |
| M          | 2,645   | 13.5    | 11.0   |
| Hi         | 363     | 1.9     | 1.5    |

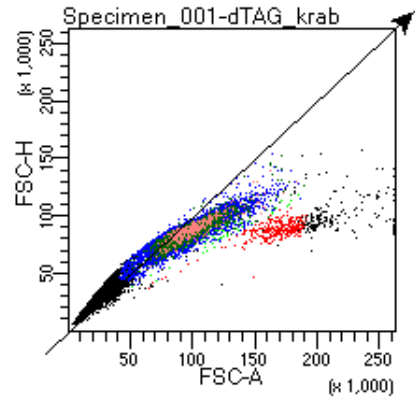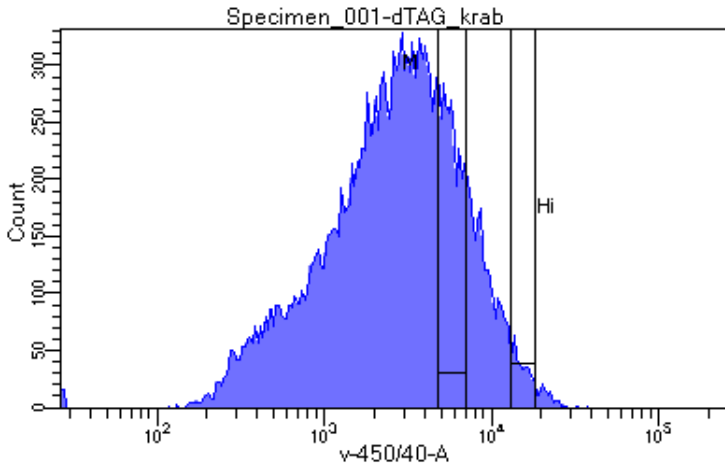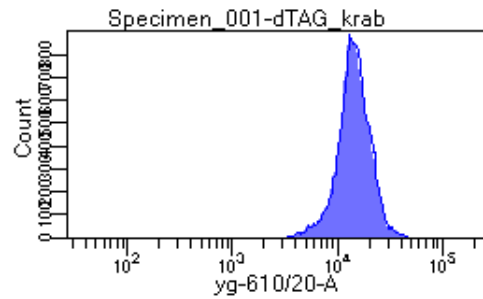

Supplement: 41467_2023_38909_MOESM7_ESM.pdf [file 41467_2023_38909_MOESM7_ESM.pdf]
