# Supplementary material for: CasTuner is a degron and CRISPR/Cas-based toolkit for analog tuning of endogenous gene expression
Source: PubMed Central journal article supplement (PMC10239436; doi:10.1038/s41467-023-38909-4), 2023-06-03

Short name:  
dCas9-tagRFPT-P2A-tagBFP  
Full name:  
pSLPB2-SpdCas9-tagRFPT-P2A-tagBFP-PGK-Blasticidin

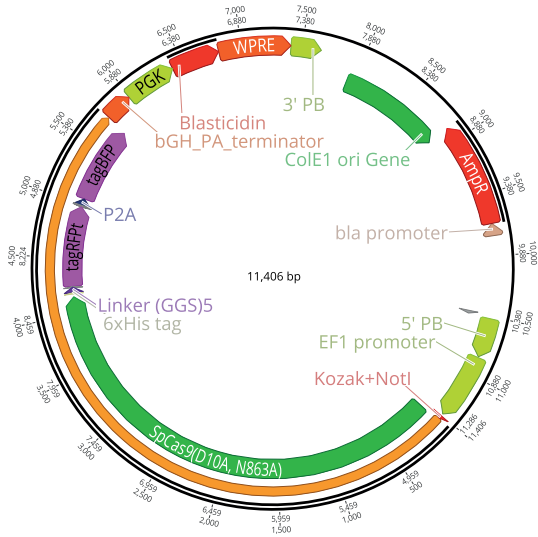

Short name:  
AID-dCas9-tagRFPT-P2A-tagBFP  
Full name:  
pSLPB3B-AID-SpdCas9-tagRFPT-P2A-tagBFP-PGK-Blasticidin-T2A-ostTIR1

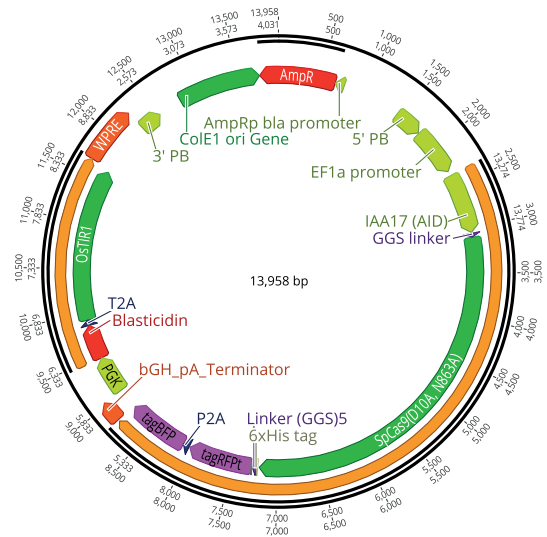

Short name:  
mAID-dCas9-tagRFPT-P2A-tagBFP  
Full name:  
pSLPB3B-AID-SpdCas9-tagRFPT-P2A-tagBFP-PGK-Blasticidin-T2A-ostTIR1

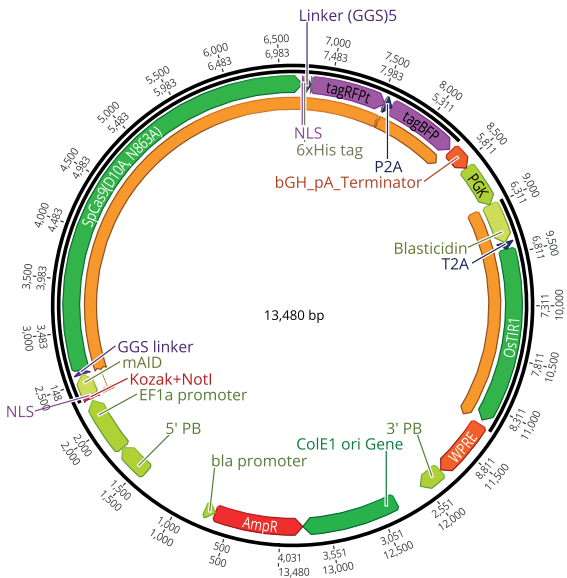

Short name:  
ER50-dCas9-tagRFPT-P2A-tagBFP  
Full name:  
pSLPB2B-ER50-SpdCas9-tagRFPT-P2A-tagBFP-PGK-Blasticidin

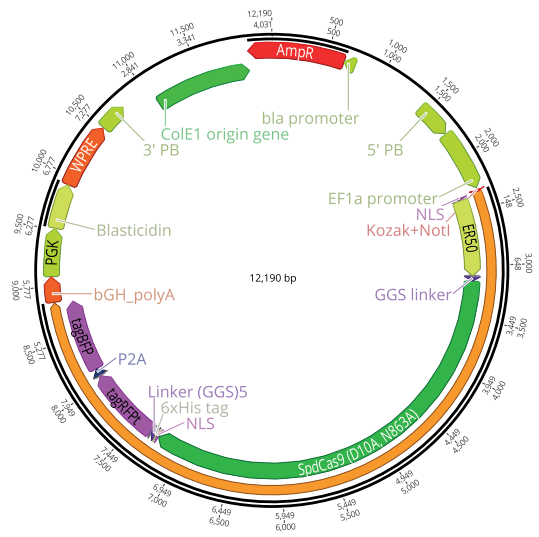

Short name:  
SMASH-dCas9-tagRFPT-P2A-tagBFP  
Full name:  
pSLPB2B-SMASH-SpdCas9-tagRFPT-P2A-tagBFP-PGK-Blasticidin

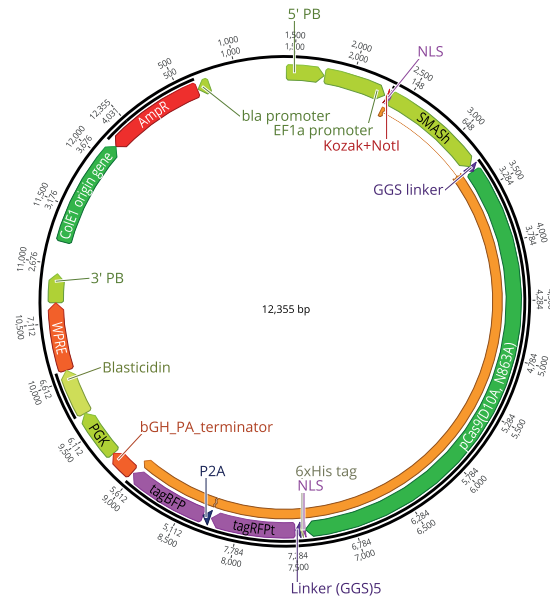

Short name:  
ecDHFR-dCas9-tagRFPT-P2A-tagBFP  
Full name:  
pSLPB2B-ecDHFR-SpdCas9-tagRFPT-P2A-tagBFP-PGK-Blasticidin

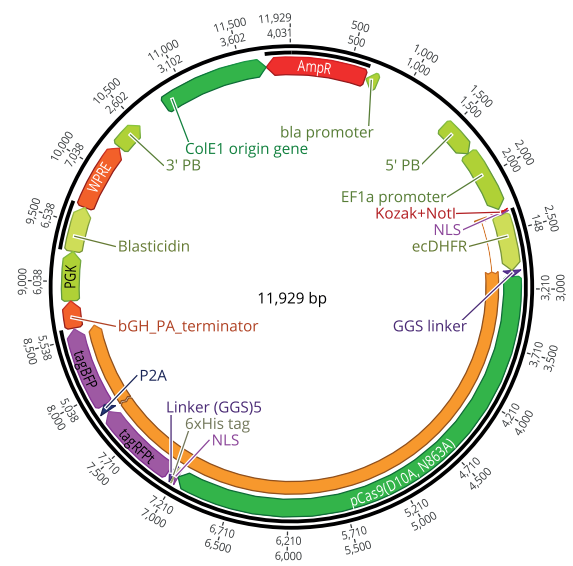

Short name:  
FKBP12\_F36V-dCas9-tagRFPT-P2A-tagBFP  
Full name:  
pSLPB2B-FKBP12\_F36V-SpdCas9-tagRFPT-P2A-tagBFP-PGK-Blasticidin

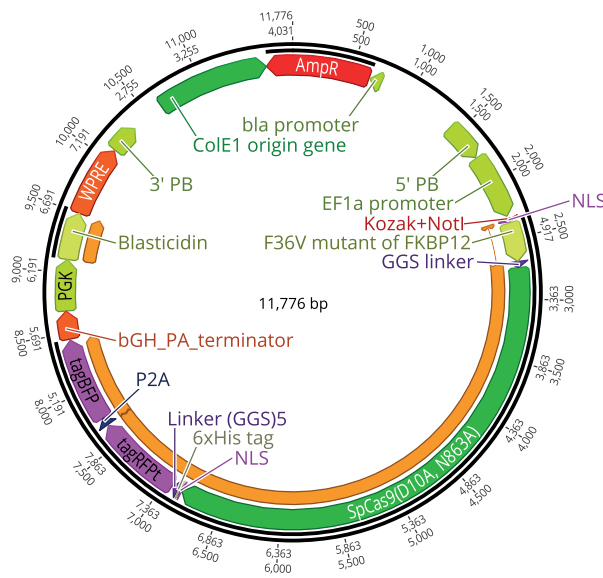

Short name:  
FKBP12\_F36V-CasRx-tagBFP  
Full name:  
pSLPB2B-FKBP12\_F36V-CasRx-tagBFP-PGK-Blasticidin

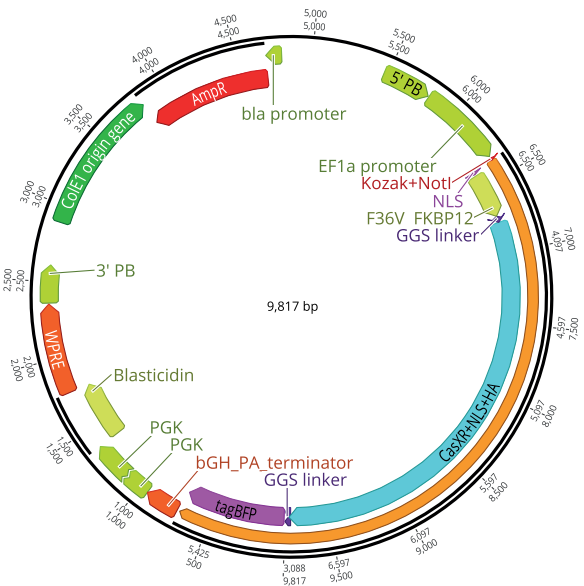

Short name:  
FKBP12\_F36V-dCas9-KRAB-tagBFP  
Full name:  
pSLPB2B-FKBP12\_F36V-SpdCas9-KRAB-tagBFP-PGK-Blasticidin

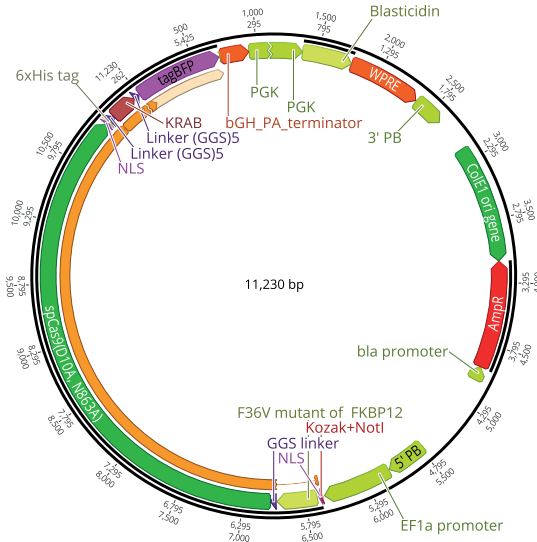

Short name:  
FKBP12\_F36V-dCas9-hHDAC4-tagBFP  
Full name:  
pSLPB2B-FKBP12\_F36V-SpdCas9-hHDAC4-tagBFP-PGK-Blasticidin

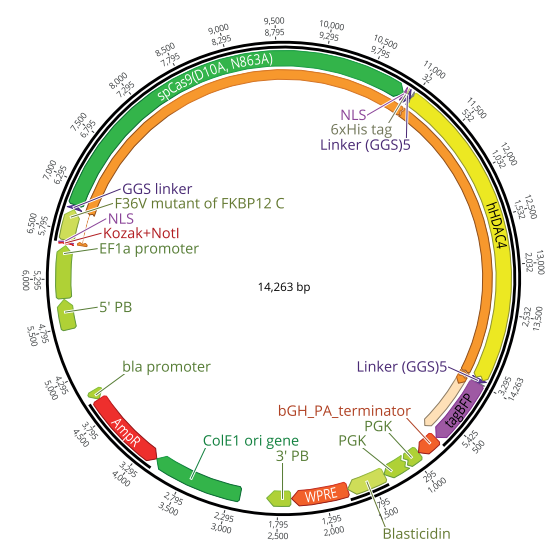

Short name:  
FKBP12\_F36V-KRAB-dCas9-tagBFP  
Full name:  
pSLPB2B-FKBP12\_F36V-KRAB-SpdCas9-tagBFP-PGK-Blasticidin

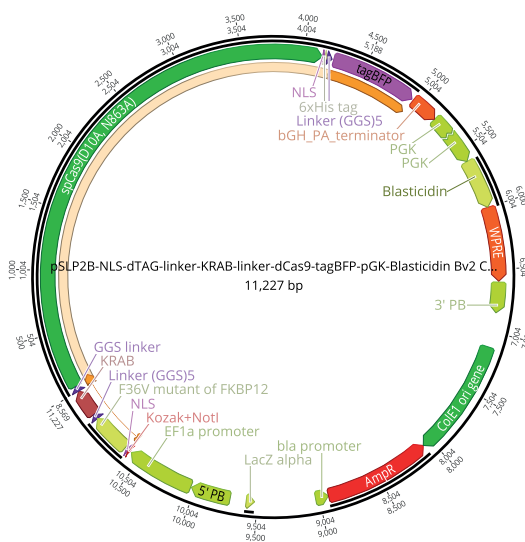

Short name:  
FKBP12\_F36V-hHDAC4-dCas9-tagBFP  
Full name:  
pSLPB2B-FKBP12\_F36V-hHDAC4-SpdCas9-tagBFP-PGK-Blasticidin

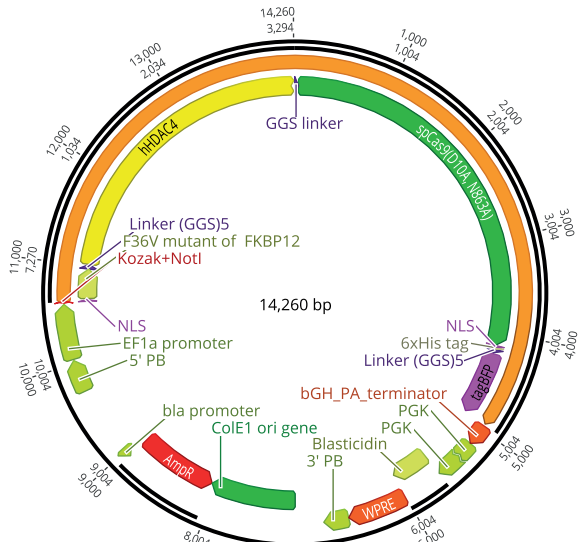

Short name:  
 KRAB-Split-dCas9-FKBP12\_F36V  
 Full name:  
 pSLQ2818\_Blasti\_pPB: CAG-PYL1-KRAB-IRES-Blasti-WPRE-SV40PA  
 PGK-ABI-tagBFP-SpdCas9-FKBP\_F36V

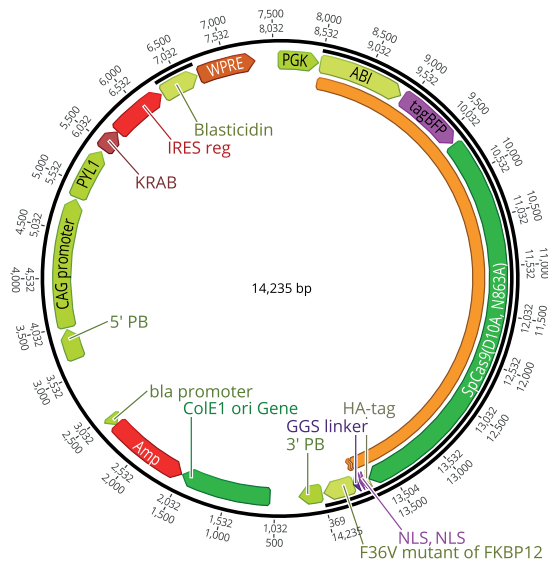

Supplement: 41467_2023_38909_MOESM8_ESM.pdf [file 41467_2023_38909_MOESM8_ESM.pdf]
