# Supplementary material for: CasTuner is a degron and CRISPR/Cas-based toolkit for analog tuning of endogenous gene expression
Source: PubMed Central journal article supplement (PMC10239436; doi:10.1038/s41467-023-38909-4), 2023-06-03
Supplement: 41467_2023_38909_MOESM4_ESM.pdf [file 41467_2023_38909_MOESM4_ESM.pdf]

**Title: Supplementary Data 1.**

**Description:** Reagents

Part A: Sequences of sgRNA for dCas9.

Part B: Sequences of sgRNA for CasRx.

Part C: Oligonucleotides sequences for cloning of CasRx guides.

Part D: qPCR primers.

Part E: Plasmid overview

**Title: Supplementary Data 2.**

**Description:** Raw counts of Alkaline-Phosphatase stained cells upon Nanog titration.

**Title: Supplementary Data 3.**

**Description:** Strategy for double-sorting by FACS of cell lines with degron-Cas-repressor systems.

**Title: Supplementary Data 4.**

**Description:** Maps of plasmids used in this study.
